# Supplementary material for: Expression Levels of Long Non-Coding RNAs Change in Models of Altered Muscle Activity and Muscle Mass
Source: MDPI journal article supplement (doi:10.3390/ijms21051628), 2020-02-27
Supplement: s1 [file s1]

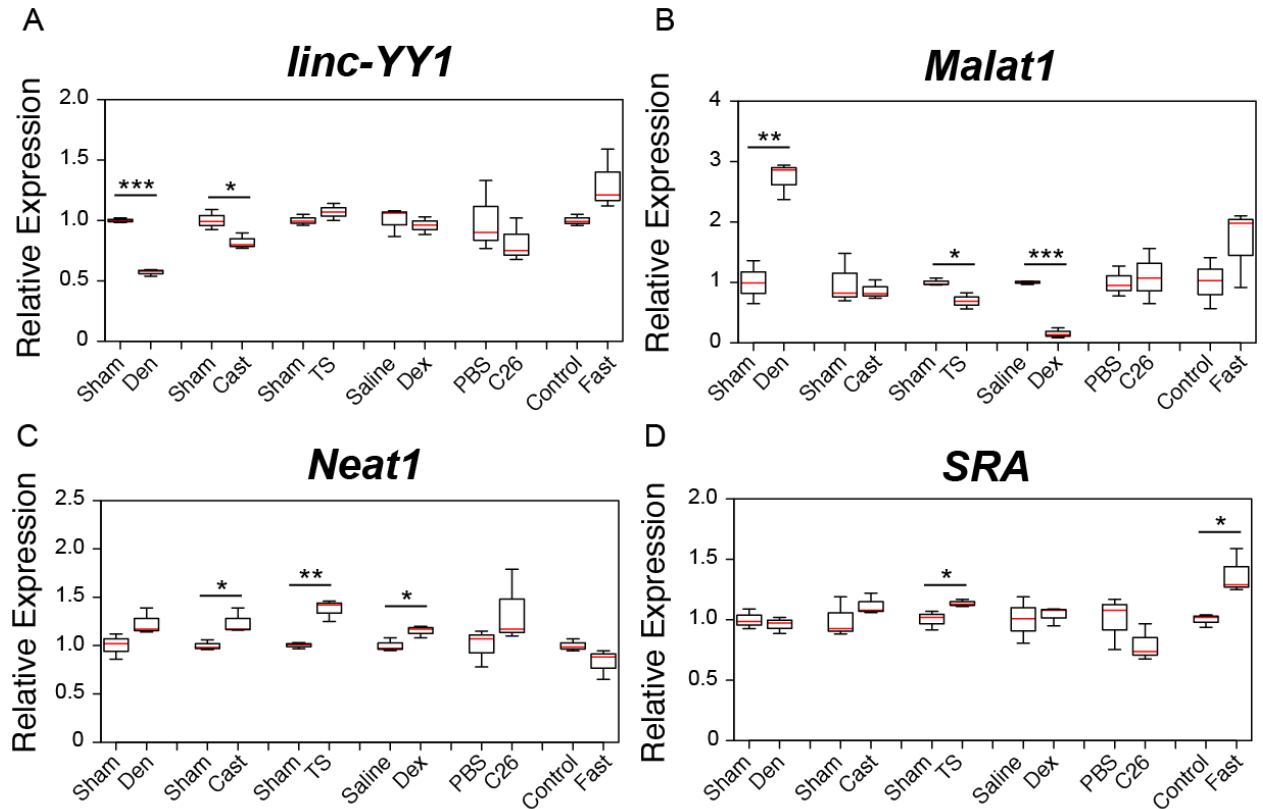

**Supplementary Figure S1.** Changes in the expression of skeletal muscle differentiation-related lncRNAs in six muscle atrophy conditions. (A–D) Box-and-whisker plots showing the results of quantitative RT-PCR (qRT-PCR) for *linc-YY1* (A), *Malat1* (B), *Neat1* (C), and *SRA* (D) expression in multiple muscle atrophy models. Sham; tibialis anterior (TA) muscles of sham-operated C57BL/6J mice. Den; denervated TA muscles of C57BL/6J mice. Cast; casting-operated TA muscles of C57BL/6J mice. TS; TA muscles of tail suspension-operated C57BL/6J mice. Saline; TA muscles of saline-injected C57BL/6J mice. Dex; TA muscles of dexamethasone-injected C57BL/6J mice. PBS; TA muscles of control phosphate-buffered saline (PBS)-injected CD2F1 mice. C26; TA muscles of C26 tumor-bearing CD2F1 mice. Control; TA muscles of C57BL/6J mice provided with water and food ad libitum. Fast; TA muscles of fasting C57BL/6J mice. qRT-PCR data were normalized to *Rpl26* expression and shown as relative expression.  $n = 3$  per group. \*  $p < 0.05$ . \*\*  $p < 0.01$ . \*\*\*  $p < 0.001$ .

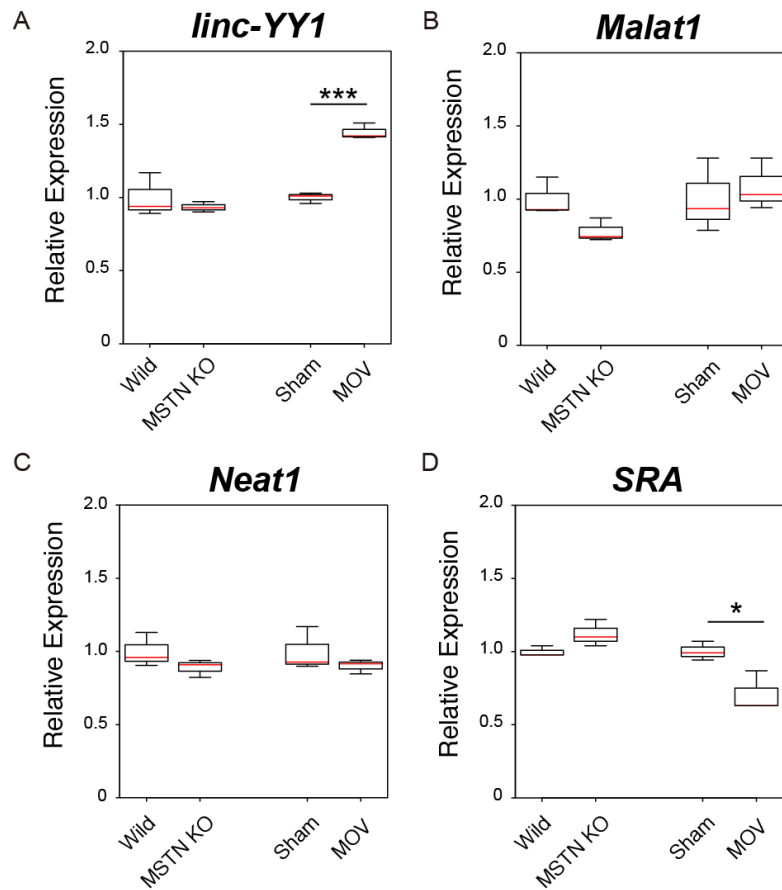

**Supplementary Figure S2.** Changes in the expression levels of skeletal muscle differentiation-related lncRNAs in skeletal muscle hypertrophy conditions. (A–D) Box-and-whisker plots showing the results of quantitative RT-PCR (qRT-PCR) for *linc-YY1* (A), *Malat1* (B), *Neat1* (C), and *SRA* (D) expression in two muscle hypertrophy conditions. Wild; tibialis anterior (TA) muscles of control C57BL/6J mice. MSTN KO; TA muscles of C57BL/6J-background *myostatin* knockout mice. Sham; plantaris muscles of sham-operated C57BL/6J mice. MOV; plantaris muscles of mechanical overload (MOV)-operated C57BL/6J mice. qRT-PCR data were normalized to *Rpl26* expression and shown as relative expression.  $n = 3$  per group. \*  $p < 0.05$ . \*\*\*  $p < 0.001$ .
